# Supplementary material for: The giant genome of lily provides insights into the hybridization of cultivated lilies
Source: Springer Nature journal article supplement (doi:10.1038/s41467-024-55545-8), 2025-01-02
Supplement: MOESM3 [file 41467_2024_55545_MOESM3_ESM.pdf › 41467_2024_55545_MOESM3_ESM.pdf]

### **Description of Additional Supplementary Files**

File name: Supplementary Data 1:

Description: Statistics of RNA-seq Liliaceae samples used in our study.

File name: Supplementary Data 2.

Description: Statistics of RNA-seq samples of flame lily used in our study.

File name: Supplementary Data 3.

Description: Gene functions of potential candidate genes involved in bulb development.

File name: Supplementary Data 4.

Description: Downloaded links of the RNA-seq data of 1KP database.

File name: Supplementary Data 5.

Description: Gene ID and their corresponding symbols.

File name: Supplementary Data 6.

Description: CDS sequences of cloned genes.

File name: Supplementary Data 7.

Description: Accession numbers in the NCBI GenBank database of the previously reported functional genes used in our study.
